# Supplementary material for: Candida rugosa lipase immobilization on magnetic silica aerogel nanodispersion
Source: Royal Society of Chemistry journal article supplement (doi:10.1039/c5ra24441b), 2016-01-01
Supplement: c5ra24441b1.pdf [file c5ra24441b1.pdf]

**Electronic Supplementary Information (ESI) for:**

***Candida rugosa* lipase immobilization on magnetic silica aerogel  
nanodispersion**

Leila Amirkhani<sup>1</sup>, Jafarsadegh Moghaddas<sup>1\*</sup> and Hoda Jafarizadeh-Malmiri<sup>2</sup>

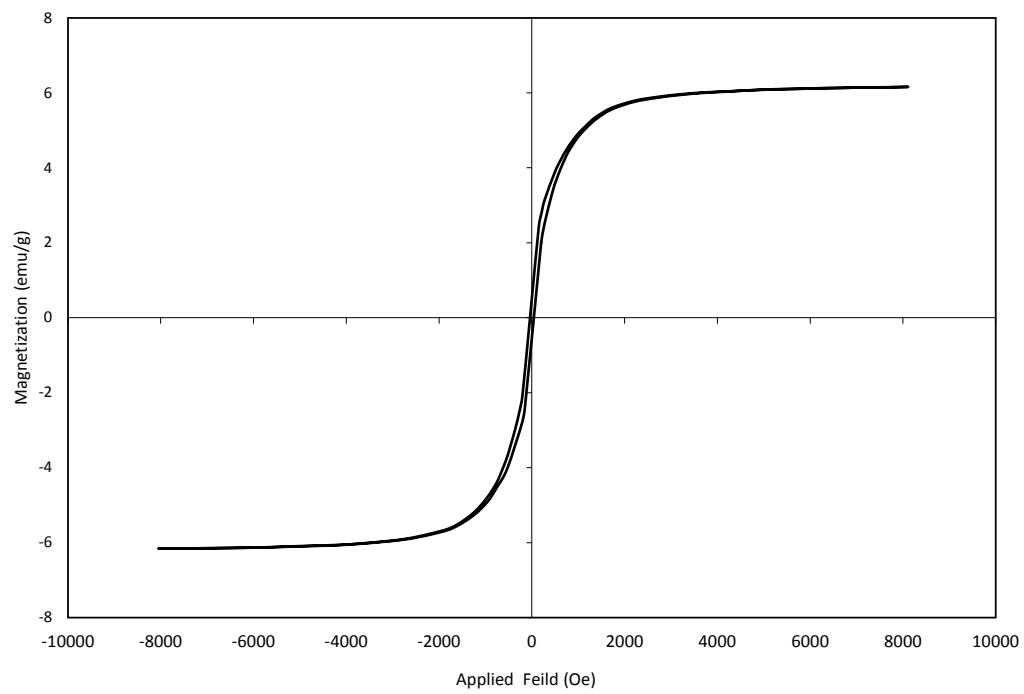

Fig. S1. Room temperature (298K) magnetization curve for silica aerogel-iron oxide nanocomposite

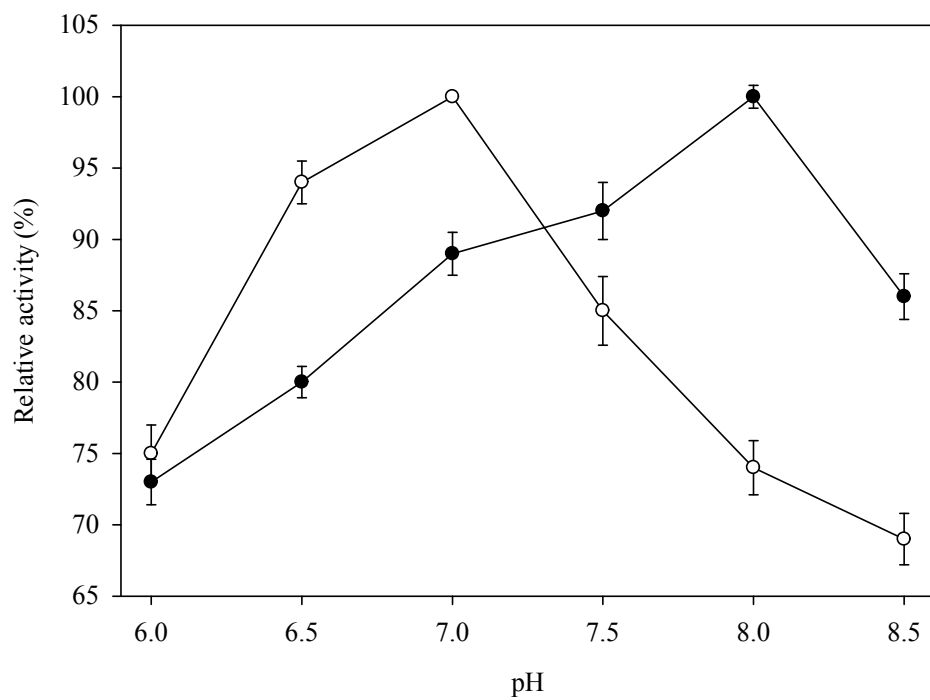

Fig. S2. Effect of pH on hydrolytic activities of the free and immobilized lipases

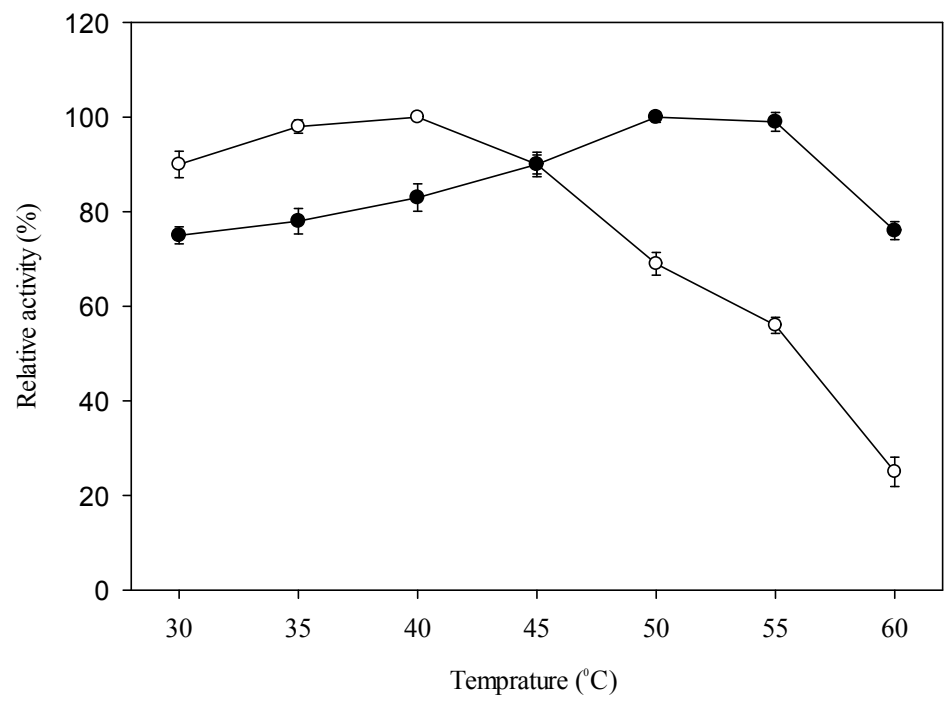

Fig. S3. Effect of temperature on hydrolytic activities of the free and immobilized lipases

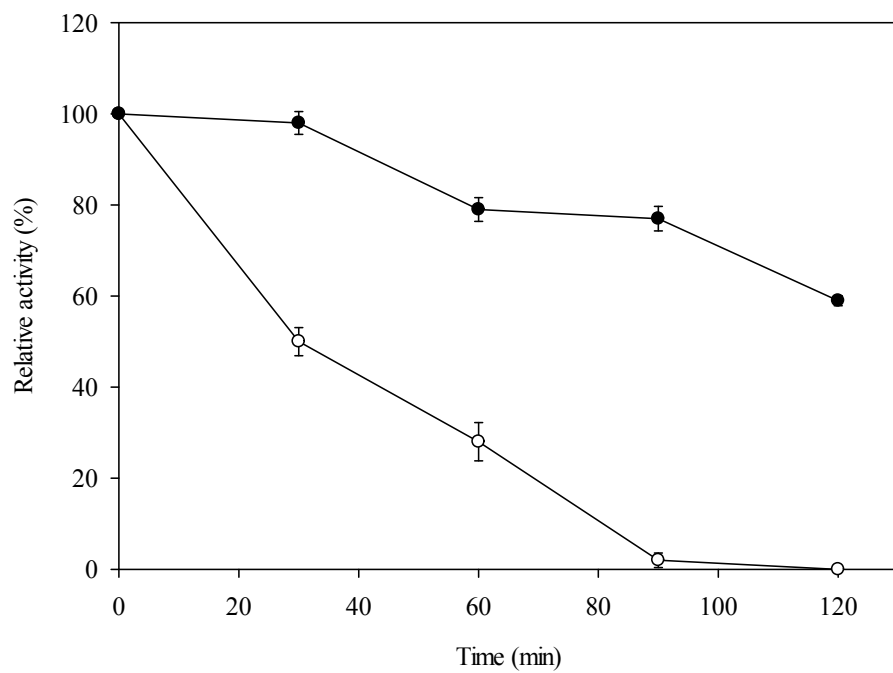

Fig. S4. Thermal stability of free and immobilized lipase at 60°C. Free lipase ○, lipase adsorbed on dispersed magnetic silica aerogel ●.

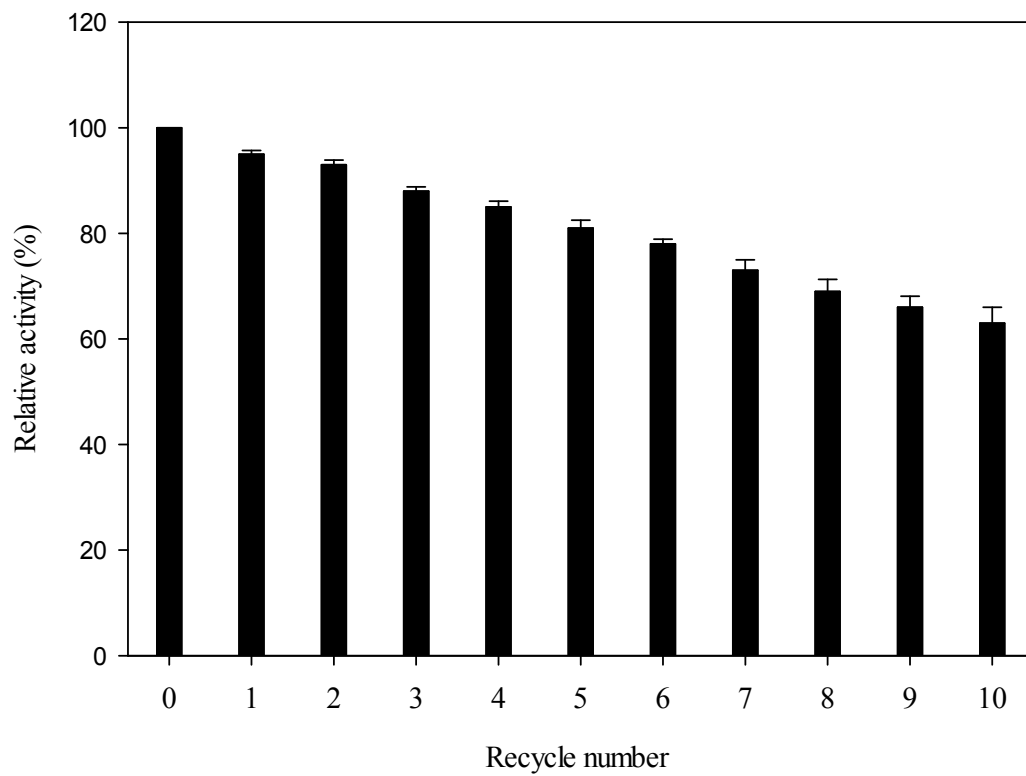

Fig. S5. Reusability of immobilized *Candida rugosa* lipase on dispersed magnetic silica aerogel

Table S1. The main independent variables and their levels used in central composite design

| Factor         | Variables | Unit | Levels        |                |        |               |               |
|----------------|-----------|------|---------------|----------------|--------|---------------|---------------|
|                |           |      | High axial    | High factorial | Center | Low factorial | Low axial     |
|                |           |      | ( $+\alpha$ ) | (+1)           | (0)    | (-1)          | ( $-\alpha$ ) |
| x <sub>1</sub> | Amplitude | %    | 49            | 45             | 35     | 25            | 21            |
| x <sub>2</sub> | Time      | min  | 10.2          | 9              | 6      | 3             | 1.8           |

Table S2. Experimental and predicted values obtained using optimum conditions of dispersion parameters

| Response variables               | Optimum conditions |              |
|----------------------------------|--------------------|--------------|
|                                  | Predicted          | Experimental |
| Specific activity (U/mg-protein) | 17.6               | 17.3±0.33    |
| Immobilization yield (%)         | 79.1               | 80±2         |
